# Supplementary material for: Robust immune response stimulated by in situ injection of CpG/αOX40/cGAMP in αPD-1-resistant malignancy
Source: Springer Nature journal article supplement (doi:10.1007/s00262-021-03095-z), 2021-11-03

**a**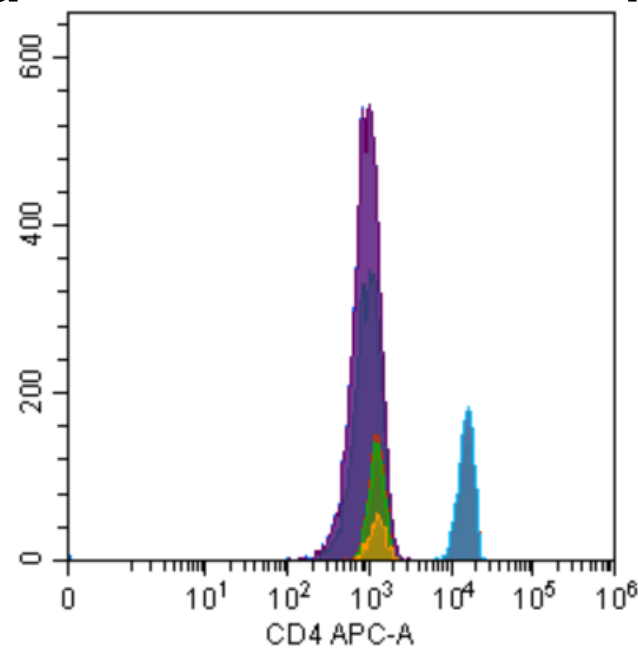**b**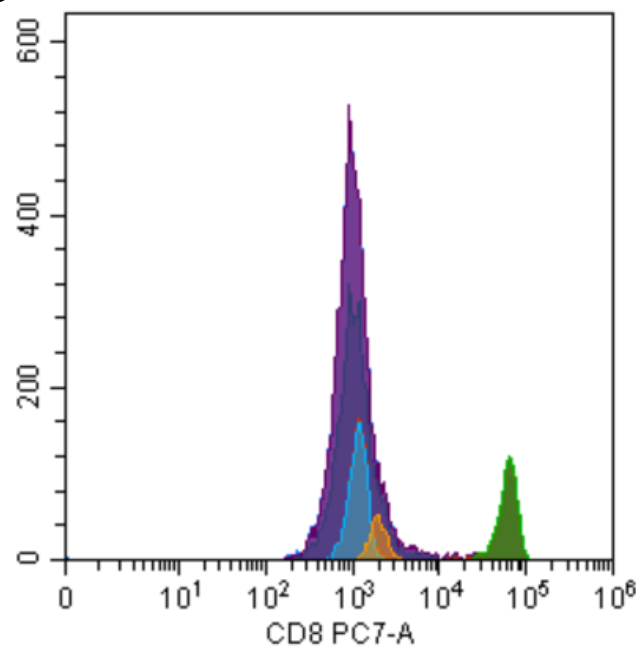**c**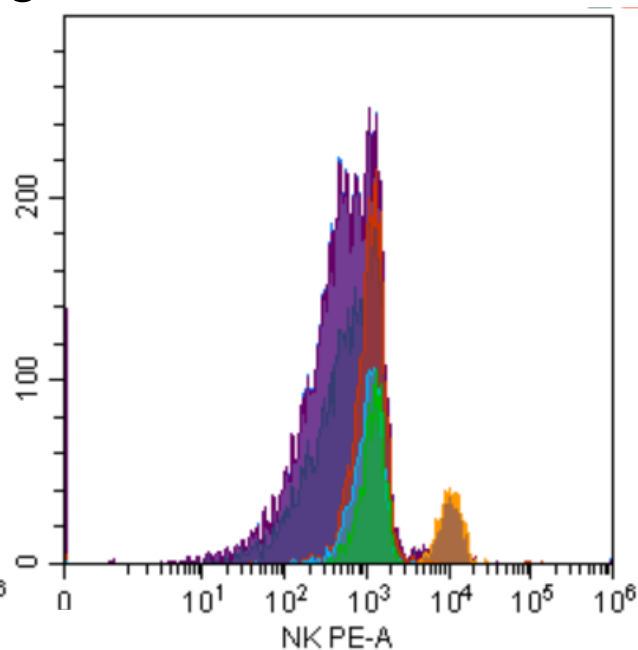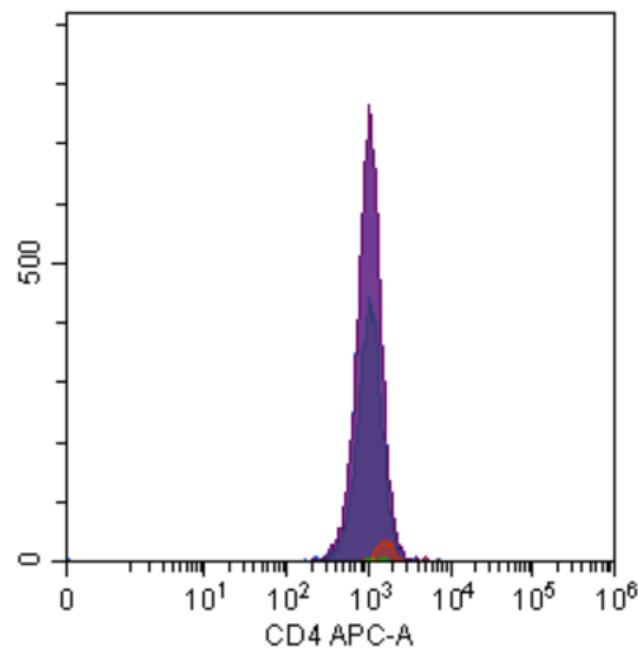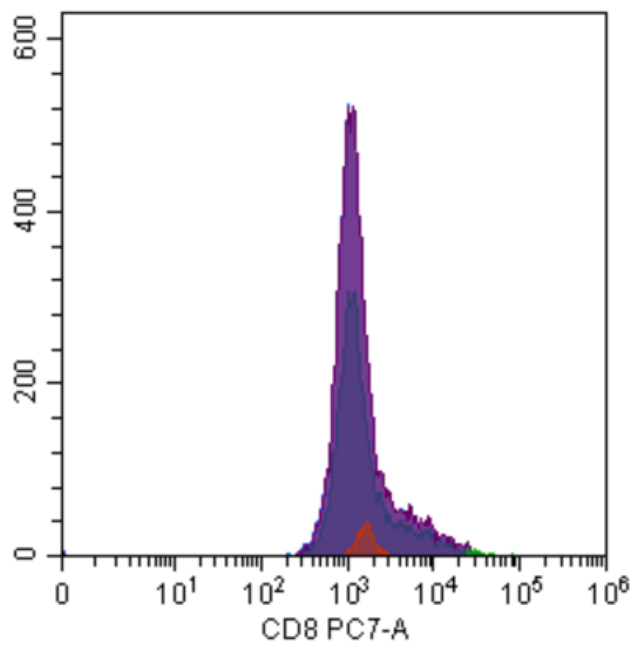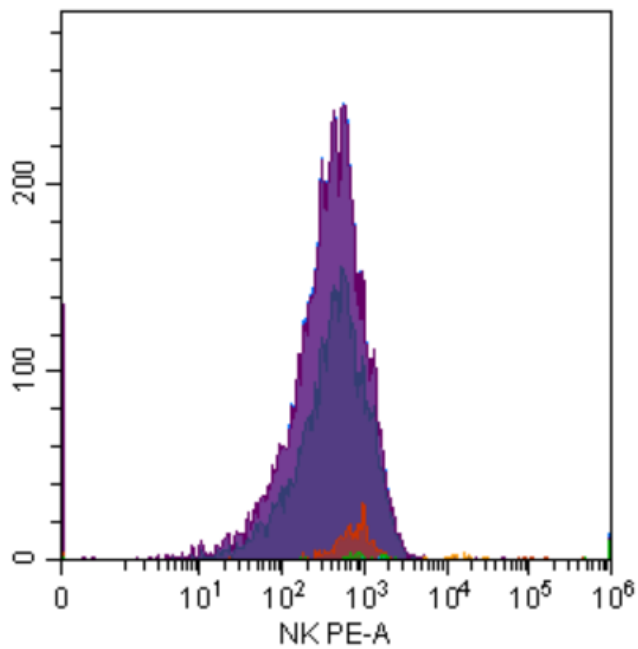

Supplement: MOESM1 [file 19826672]
