# Supplementary material for: Robust immune response stimulated by in situ injection of CpG/αOX40/cGAMP in αPD-1-resistant malignancy
Source: Springer Nature journal article supplement (doi:10.1007/s00262-021-03095-z), 2021-11-03

PBS

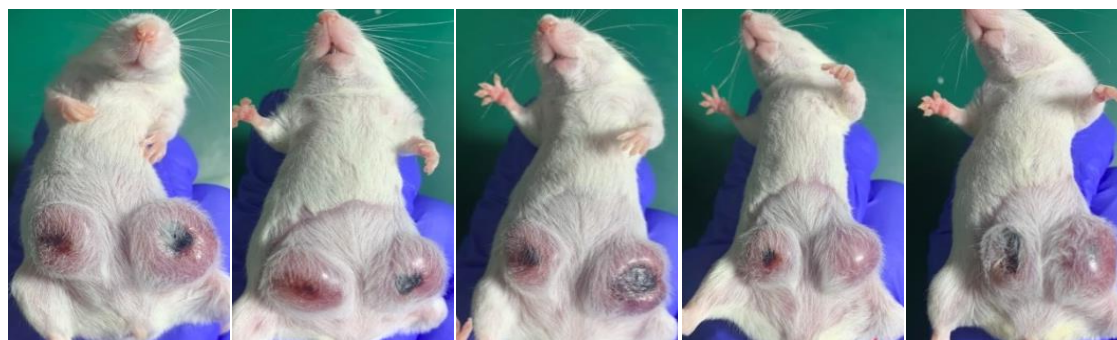

$\alpha$ PD-1

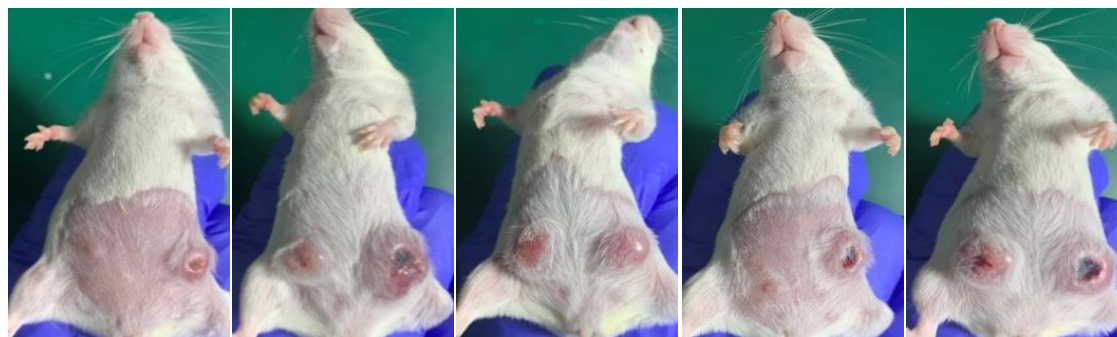

CpG/ $\alpha$  OX40/cGAMP

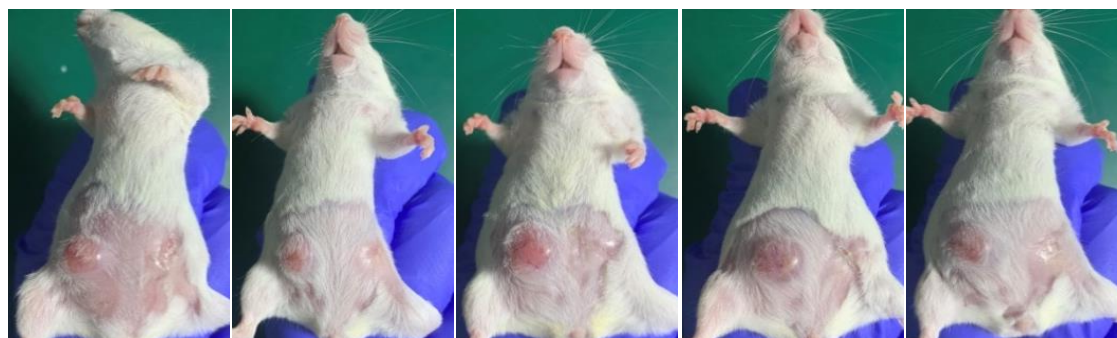

CpG/ $\alpha$  OX40/cGAMP/ $\alpha$  PD-1

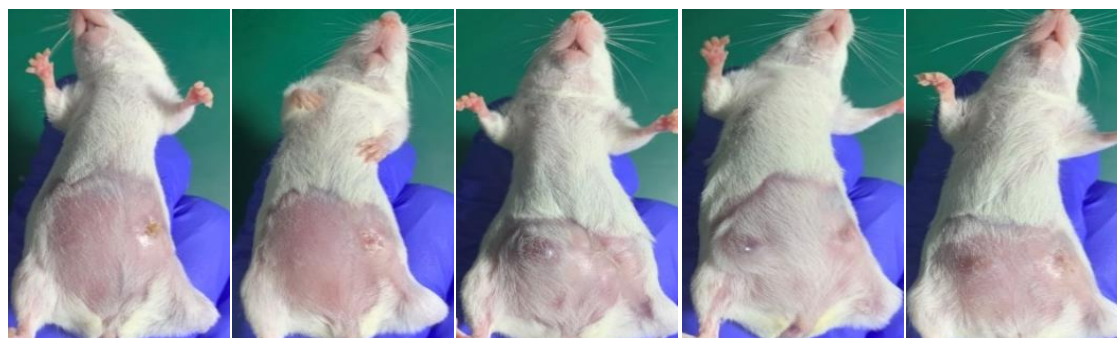

Supplement: MOESM2 [file 19826672]
